# Supplementary material for: The inheritance of monoterpenes in hybrid populations of Vitis vinifera cultivars
Source: Research Square preprint supplement (doi:10.21203/rs.3.rs-5022036/v1), 2024-10-10
Supplement: Supplementary file 2 [file 6a66038bb5a2e7473b2defd1.xlsx]

## Sheet: Table S1
Table S1 Qualitative and quantitative information of monoterpenes
Number	Monoterpenes	IDa	RIb	Quantitative ionc (m/z)	Quantitative compounds
1	Linalool	A	1581	93	Linalool
2	Citronellol	A	1766	69	Citronellol
3	Geraniol	A	1857	69	Geraniol
4	Geranial	A	1680	69	Citral
5	Geranic acid	A	2340	69	Geranic acid
6	cis-Isogeraniol	B	1818	41	Geraniol
7	trans-Isogeraniol	B	1829	41	Geraniol
8	Nerol	A	1797	69	Nerol
9	Neral	A	1755	41	Citral
10	Nerol oxide	B	1480	68	Nerol
11	β-Myrcene	A	1173	93	β-Myrcene
12	Allo-Ocimene	B	1397	121	β-Myrcene
13	(E,Z)-Allo-Ocimene	B	1381	121	β-Myrcene
14	β-cis-Ocimene	B	1242	93	β-Myrcene
15	β-trans-Ocimene	B	1251	93	β-Myrcene
16	Linalool oxide pyranoside	B	1691	68	Linalool
17	cis-Furan linalool oxide	B	1448	59	Linalool
18	trans-Furan linalool oxide	B	1477	59	Linalool
19	Phellandrene	B	1165	93	Limonene
20	Limonene	A	1205	68	Limonene
21	cis-Rose oxide	A	1338	139	Rose oxide
22	trans-Rose oxide	A	1375	139	Rose oxide
23	α-Terpineol	A	1710	136	α-Terpineol
24	4-Terpineol	A	1616	71	4-terpinenol
25	Terpinolen	A	1291	93	Terpinolen
26	γ-Terpinen	B	1253	93	Terpinolen
Notice: a: Qualitative methods for monoterpenes. A represents qualitative analysis based on the RI of standard samples, while B represents qualitative analysis based on RI values and comparison with mass spectra from the NIST library.
b: RI is the retention index of the compound on the HP-innowax chromatographic column.
c: When conducting quantitative analysis, the peak area value of this ion is used for calculation.

## Sheet: Table S2
Table S2 Grape monoterpenes standard curve
Number	Monoterpenes	Quantitative iona (m/z)	Standard curvesb	Rc	Linear range(μg/kg)
1	Linalool	93	y = 396.8x + 3.2904	R2= 0.9987	2.14-29379.24
2	Citronellol	69	y = 425.79x + 8.251	R2= 0.9979	0.68-1432.82
3	Geraniol	69	y = 317.88x + 14.768	R2= 0.9978	0.32-10095.16
4	Citral	69	y = 52.961x + 2.6933	R2= 0.9946	0.57-303.41
5	Geranic acid	69	y = 6818.4x + 7.8939	R2= 0.9954	12.56-31025.77
6	Nerol	69	y = 930.79x + 8.9527	R2= 0.9981	1.85-17506.37
7	β-Myrcene	93	y = 3350.8x - 1.0946	R2= 0.9913	4.97-14054.46
8	Limonene	68	y = 306.8x + 0.9404	R2= 0.9988	0.16-424.34
9	Rose oxide	139	y = 37.312x + 3.259	R2= 0.9986	0.04-110.12
10	α-Terpineol	136	y = 958.5x + 5.9227	R2= 0.9981	4.54-7636.28
11	4-terpinenol	71	y = 414.76x + 1.225	R2= 0.9997	0.24-106.53
12	Terpinolen	93	y = 300.19x + 1.3797	R2= 0.9965	1.91-1156.79
Notice: a: When conducting quantitative analysis, the peak area value of this ion is used for calculation.
b: X is the ratio of the peak area of the quantitative ion of this compound to the peak area of the b: internal standard compound, and y represents the concentration of the standard.
c: The regression coefficient of the standard curve formula.

## Sheet: Table S3
Table S3 Pearson correlation coefficients among 26 monoterpenes
Monoterpenes	Linalool	Citronellol	Geraniol	Geranial	Geranic acid	c-isogeraniol	t-isogeraniol	Nerol	Neral	Nerol oxide	β-Myrcene	Allo-Ocimene	(E,Z)-Allo-Ocimene	β-c-Ocimene	β-t-Ocimene	Linalool oxide(P)	c-Linalool oxide(F)	t-Linalool oxide(F)	Phellandrene	Limonene	c-Rose oxide	t-Rose oxide	α-Terpineol	4-Terpineol	Terpinolen	γ-Terpinen
Linalool	1
Citronellol	0.293**	1
Geraniol	0.279**	0.531**	1
Geranial	0.178*	0.579**	0.761**	1
Geranic acid	0.133	0.515**	0.480**	0.346**	1
c-isogeraniol	0.534**	0.446**	0.511**	0.556**	0.322**	1
t-isogeraniol	0.252**	0.422**	0.693**	0.303**	0.425**	0.290**	1
Nerol	0.475**	0.717**	0.733**	0.598**	0.534**	0.504**	0.661**	1
Neral	0.242**	0.463**	0.426**	0.391**	0.263**	0.396**	0.277**	0.411**	1
Nerol oxide	0.037	0.074	0.157*	0.097	0.015	0.027	0.06	0.09	0.096	1
β-Myrcene	0.501**	0.251**	0.551**	0.408**	0.097	0.416**	0.410**	0.487**	0.200**	0.04	1
Allo-Ocimene	0.549**	0.489**	0.572**	0.783**	0.190*	0.680**	0.225**	0.641**	0.337**	0.099	0.606**	1
(E,Z)-Allo-Ocimene	0.628**	0.365**	0.522**	0.531**	0.161*	0.686**	0.409**	0.637**	0.355**	0.084	0.613**	0.829**	1
β-c-Ocimene	0.607**	0.308**	0.457**	0.474**	0.079	0.489**	0.304**	0.554**	0.264**	0.078	0.756**	0.761**	0.775**	1
β-t-Ocimene	0.621**	0.261**	0.489**	0.361**	0.113	0.464**	0.492**	0.620**	0.301**	0.072	0.727**	0.687**	0.838**	0.871**	1
Linalool oxide(P)	0.610**	0.427**	0.373**	0.369**	0.228**	0.399**	0.242**	0.536**	0.357**	0.447**	0.399**	0.589**	0.650**	0.582**	0.588**	1
c-Linalool oxide(F)	0.628**	0.434**	0.304**	0.424**	0.129	0.495**	0.156*	0.520**	0.283**	0.078	0.508**	0.742**	0.751**	0.749**	0.643**	0.795**	1
t-Linalool oxide(F)	0.601**	0.335**	0.180*	0.218**	0.072	0.331**	0.116	0.390**	0.203**	0.072	0.357**	0.492**	0.543**	0.515**	0.500**	0.713**	0.747**	1
Phellandrene	0.224**	0.071	0.136	0.141	-0.014	0.174*	0.084	0.158*	-0.043	0.021	0.419**	0.267**	0.267**	0.596**	0.505**	0.166*	0.274**	0.171*	1
Limonene	0.648**	0.247**	0.377**	0.320**	0.081	0.445**	0.344**	0.561**	0.270**	0.389**	0.584**	0.713**	0.811**	0.797**	0.819**	0.712**	0.744**	0.559**	0.287**	1
c-Rose oxide	0.395**	0.648**	0.334**	0.279**	0.322**	0.246**	0.361**	0.547**	0.416**	0.017	0.225**	0.276**	0.291**	0.273**	0.243**	0.410**	0.413**	0.386**	0.012	0.244**	1
t-Rose oxide	0.359**	0.616**	0.253**	0.229**	0.323**	0.211**	0.271**	0.498**	0.299**	0.033	0.206**	0.201**	0.235**	0.218**	0.164*	0.404**	0.349**	0.396**	0.046	0.182*	0.727**	1
α-Terpineol	0.722**	0.278**	0.387**	0.338**	0.108	0.576**	0.353**	0.608**	0.215**	0.069	0.629**	0.777**	0.824**	0.790**	0.826**	0.571**	0.750**	0.539**	0.293**	0.891**	0.234**	0.161*	1
4-Terpineol	0.660**	0.257**	0.332**	0.297**	0.094	0.542**	0.344**	0.571**	0.205**	0.062	0.565**	0.730**	0.780**	0.750**	0.807**	0.549**	0.729**	0.527**	0.278**	0.865**	0.215**	0.123	0.963**	1
Terpinolen	0.767**	0.269**	0.377**	0.345**	0.091	0.539**	0.370**	0.596**	0.300**	0.067	0.589**	0.745**	0.843**	0.805**	0.871**	0.598**	0.727**	0.531**	0.302**	0.867**	0.265**	0.153*	0.910**	0.889**	1
γ-Terpinen	0.540**	0.175*	0.299**	0.291**	0.027	0.453**	0.231**	0.398**	0.136	0.054	0.650**	0.619**	0.643**	0.835**	0.806**	0.405**	0.578**	0.376**	0.605**	0.656**	0.136	0.057	0.720**	0.728**	0.716**	1
Notice: **,* At the 0.01 and 0.05 level, the correlation is significant.
