# Supplementary figures and images for: The inheritance of monoterpenes in hybrid populations of Vitis vinifera cultivars
Source: Research Square preprint supplement (doi:10.21203/rs.3.rs-5022036/v1), 2024-10-10

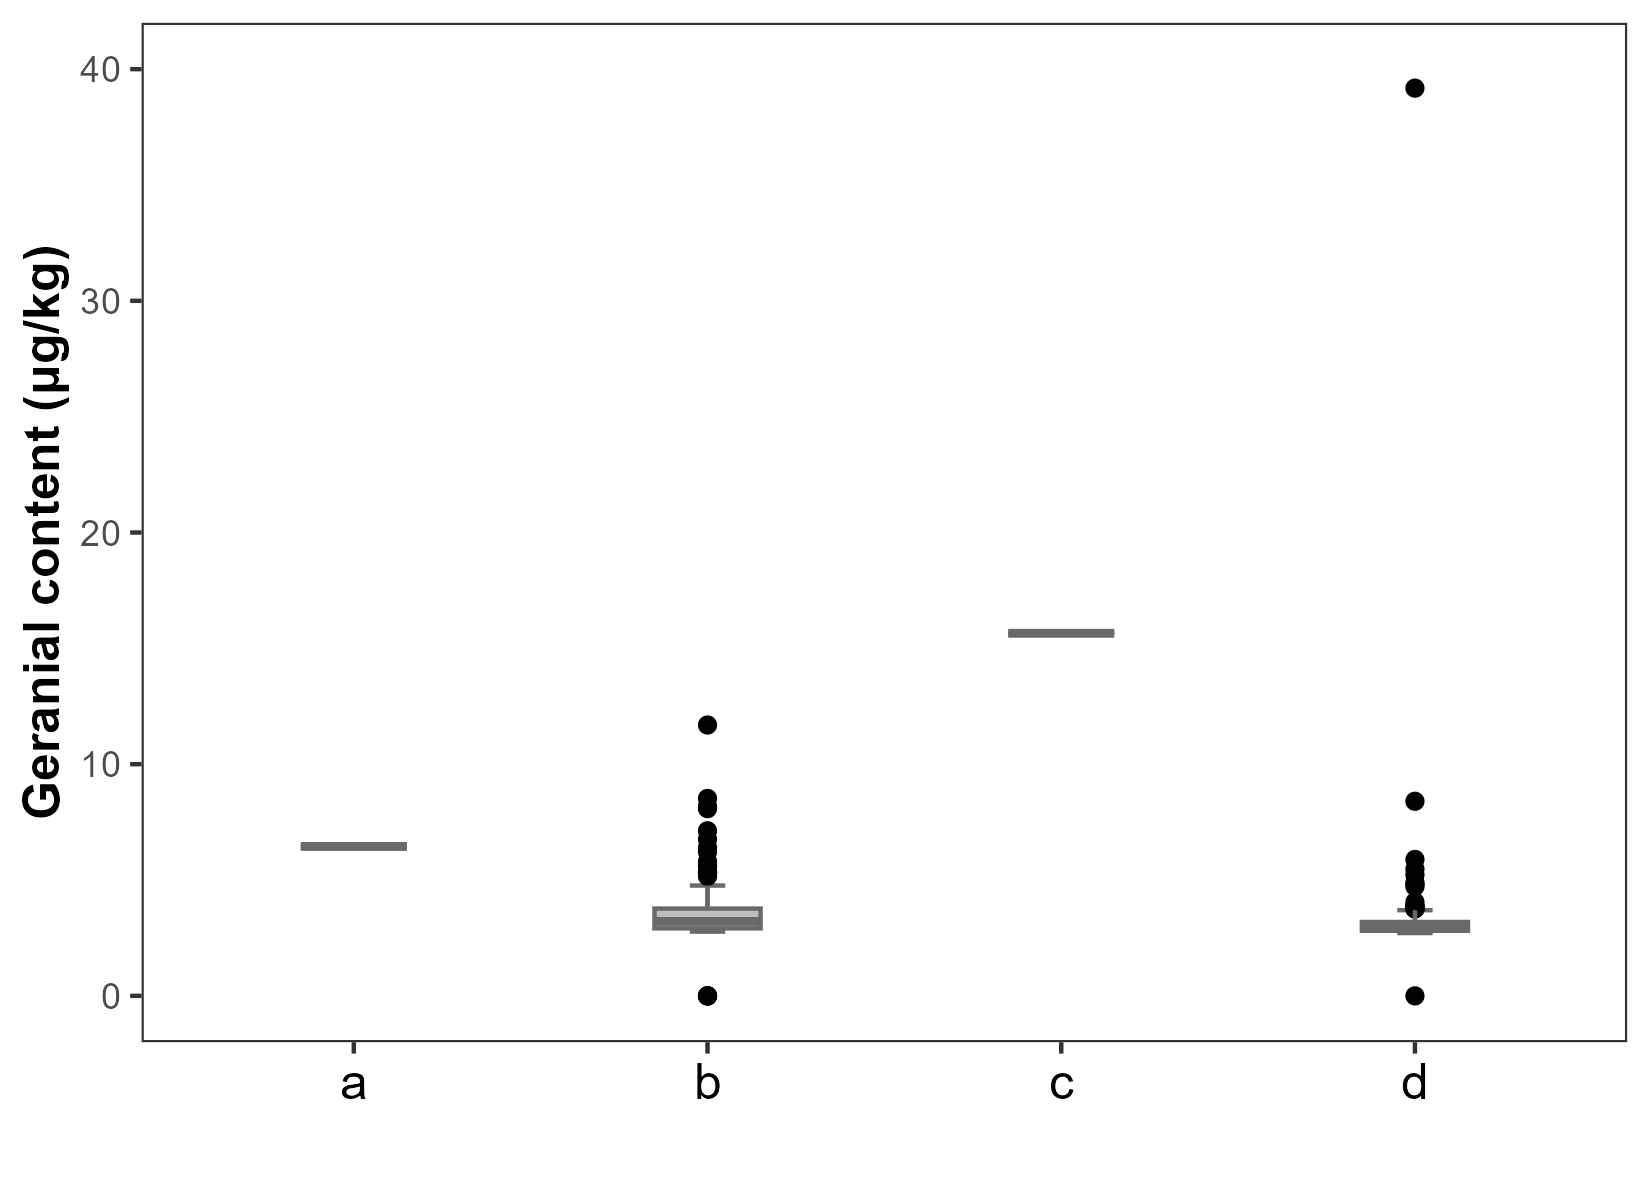

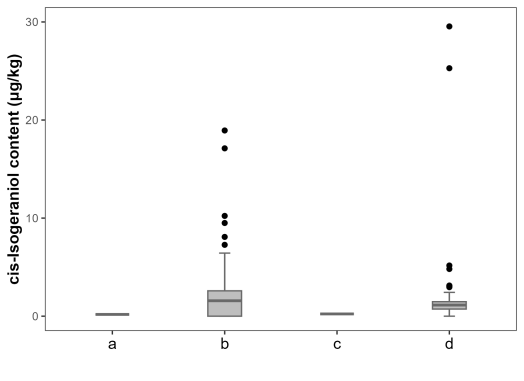


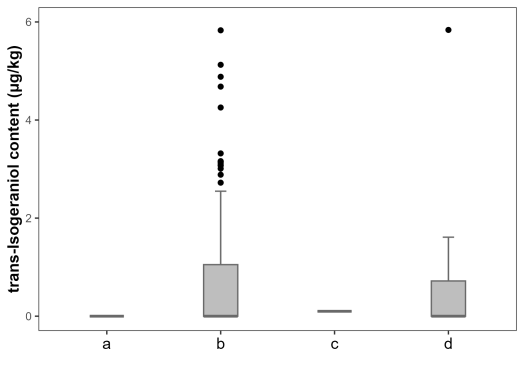

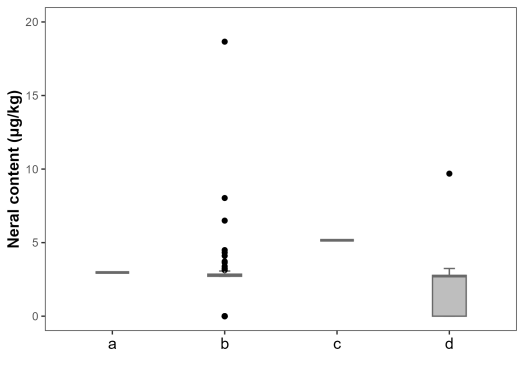


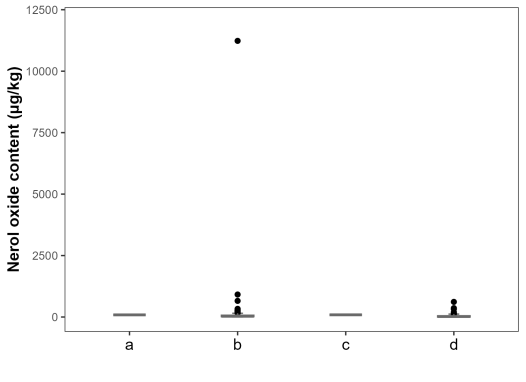

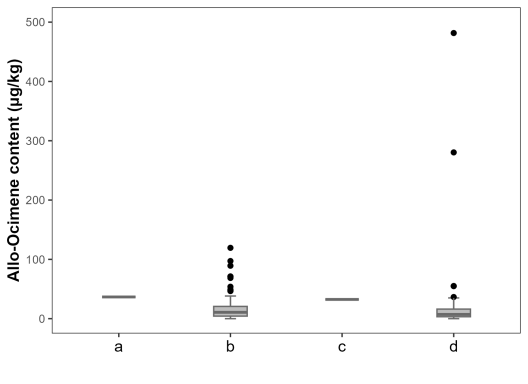


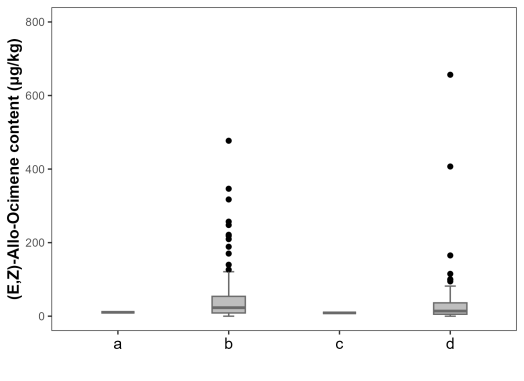

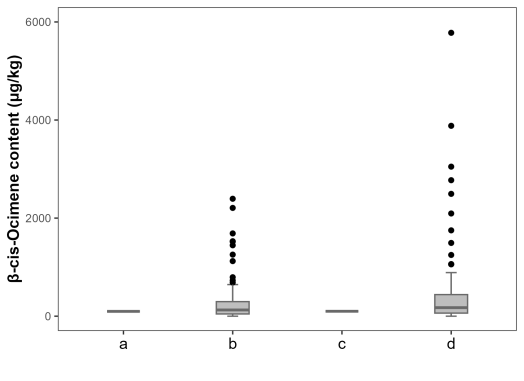


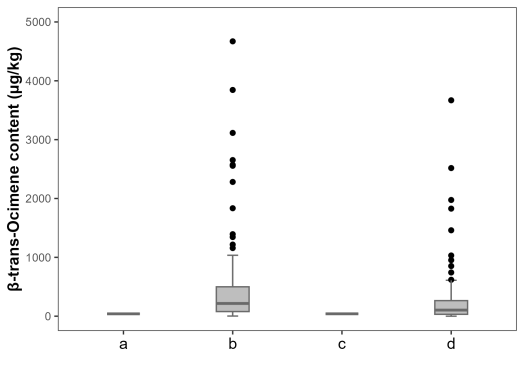

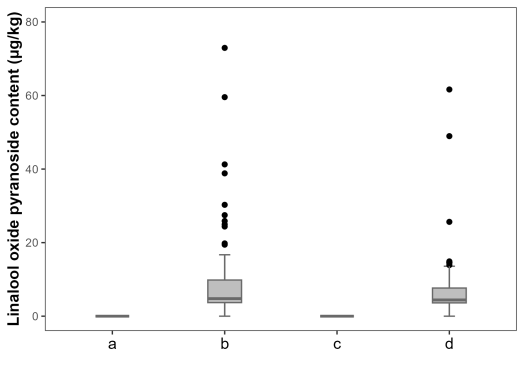


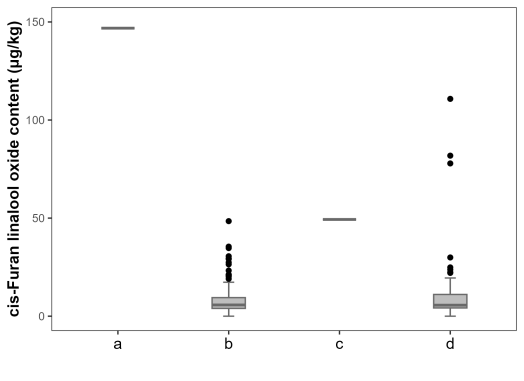

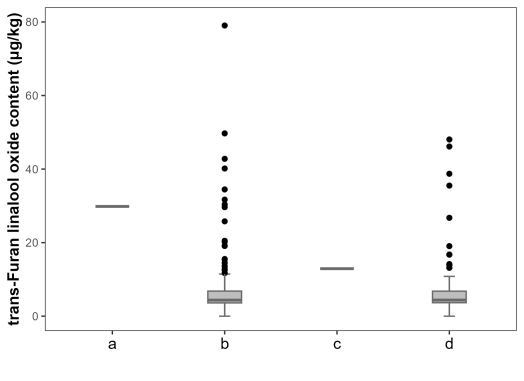


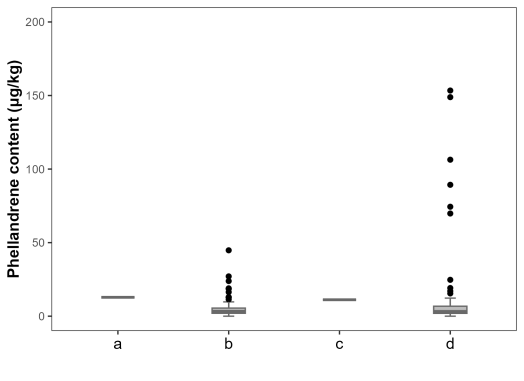

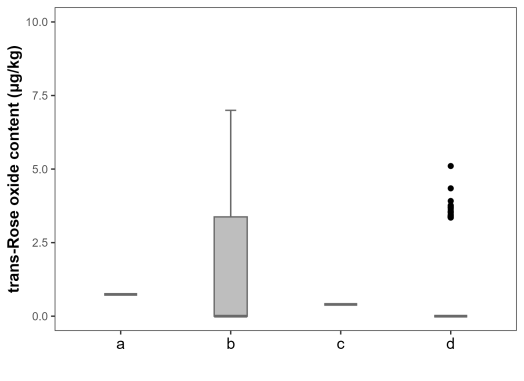


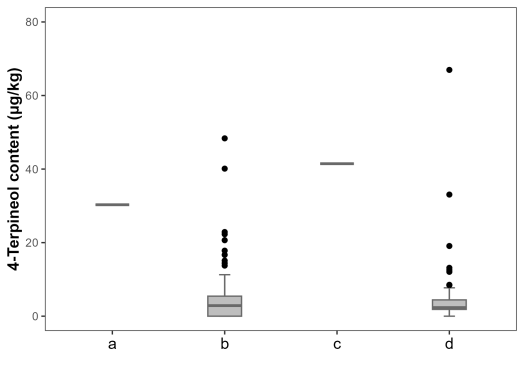

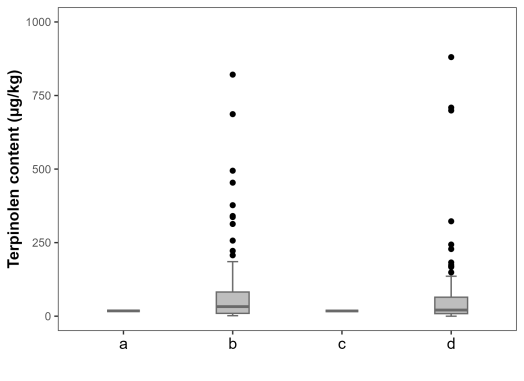


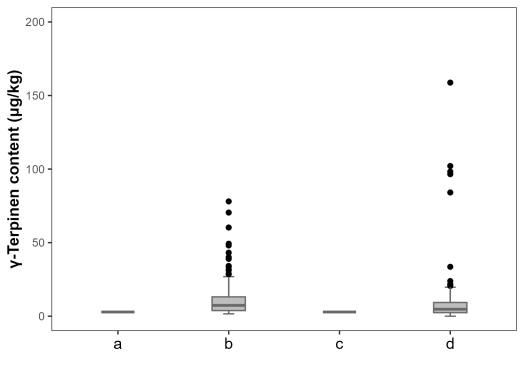


**Fig. S1** The content range and distribution of 17 monoterpenes in two years.

Supplement: Supplementary file 1 [file 69cd36ca1b0da8ea635374ef.docx]
